# Supplementary material for: A cationic Zr-based metal organic framework with enhanced acidic resistance for selective and efficient removal of CrO42−
Source: Royal Society of Chemistry journal article supplement (doi:10.1039/d0nj02279a), 2020-01-01
Supplement: d0nj02279a1.pdf [file d0nj02279a1.pdf]

## Electronic Supplementary Information (ESI)

# **Cationic Zr-based metal organic framework with enhanced acidic resistance for selective and efficient removal of $\text{CrO}_4^{2-}$**

Chao Jiang<sup>a</sup>, Ruopei Sun<sup>a</sup>, Ziyao Du<sup>a</sup>, Vikramjeet Singh<sup>c</sup> and Suwen Chen<sup>ab\*</sup>

<sup>a</sup>Radiochemistry Lab, School of Nuclear Science and Technology, Lanzhou University, 730000, Lanzhou, P. R. China

<sup>b</sup>Key Laboratory of Special Function Materials and Structure Design, Ministry of Education, Lanzhou University, 730000, Lanzhou, P. R. China

<sup>c</sup>Nanoengineered Systems Laboratory, UCL Mechanical Engineering, University College London, London, UK

\* Corresponding author: [chensuwen@lzu.edu.cn](mailto:chensuwen@lzu.edu.cn)

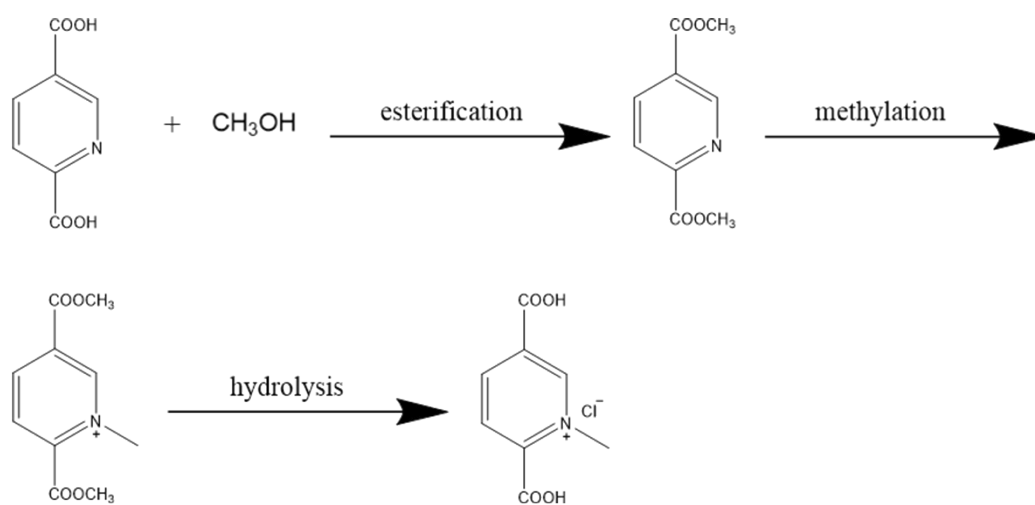

**Scheme.S1.** Synthesis of Ligand me-PyDC.

**Table.S1.** Experimental parameters for synthesis of Zr-C-MOF.

| number | ZrCl <sub>4</sub><br>(mg) | me-PyDC<br>(mg) | H <sub>2</sub> O<br>( $\mu$ L) | formic acid<br>( $\mu$ L) | Product        | Yield<br>(mg) |
|--------|---------------------------|-----------------|--------------------------------|---------------------------|----------------|---------------|
| 1      | 26.5                      | 25.0            | 4960                           | 40                        | white<br>power | 25.1          |
| 2      | 26.5                      | 25.0            | 4920                           | 80                        | white<br>power | 24.1          |
| 3      | 26.5                      | 25.0            | 4840                           | 160                       | white<br>power | 27.1          |
| 4      | 26.5                      | 25.0            | 4500                           | 500                       | white<br>power | 20.8          |
| 5      | 26.5                      | 25.0            | 4000                           | 1000                      | white<br>power | 20.9          |
| 6      | 26.5                      | 25.0            | 3000                           | 2000                      | white<br>power | 3.7           |
| 7      | 26.5                      | 25.0            | 2000                           | 3000                      | no<br>solid    | 0             |

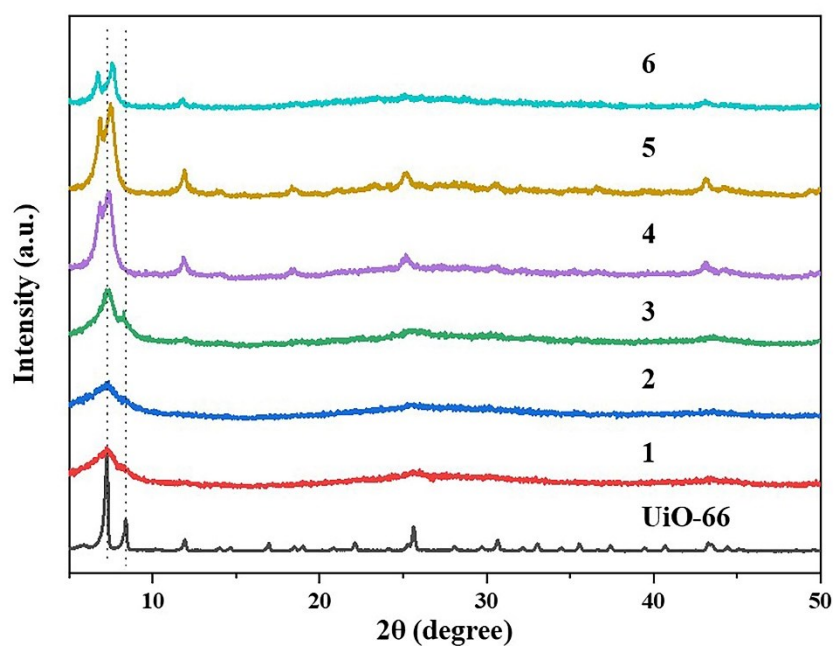**Fig.S1.** Powder X-ray diffraction (PXRD) patterns of UiO-66 and product synthesized at different experimental parameters.

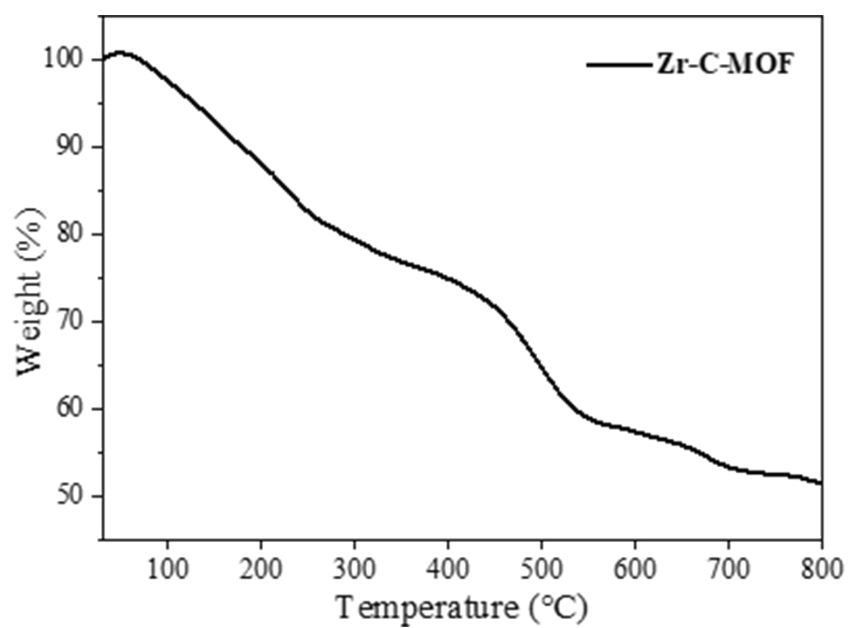

**Fig.S2.** TGA curves of Zr-C-MOF.

**Table.S2.** Elemental analysis of Zr-C-MOF.

| Sample   | C %  | H %   | N %  |
|----------|------|-------|------|
| Zr-C-MOF | 20.6 | 2.460 | 2.59 |

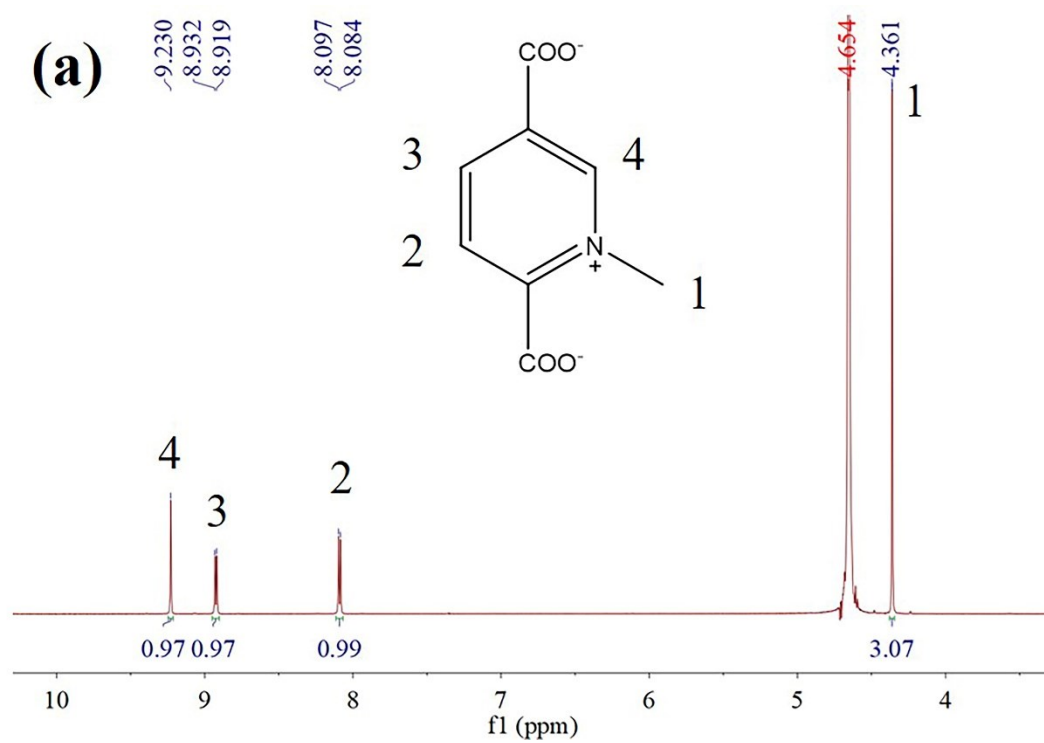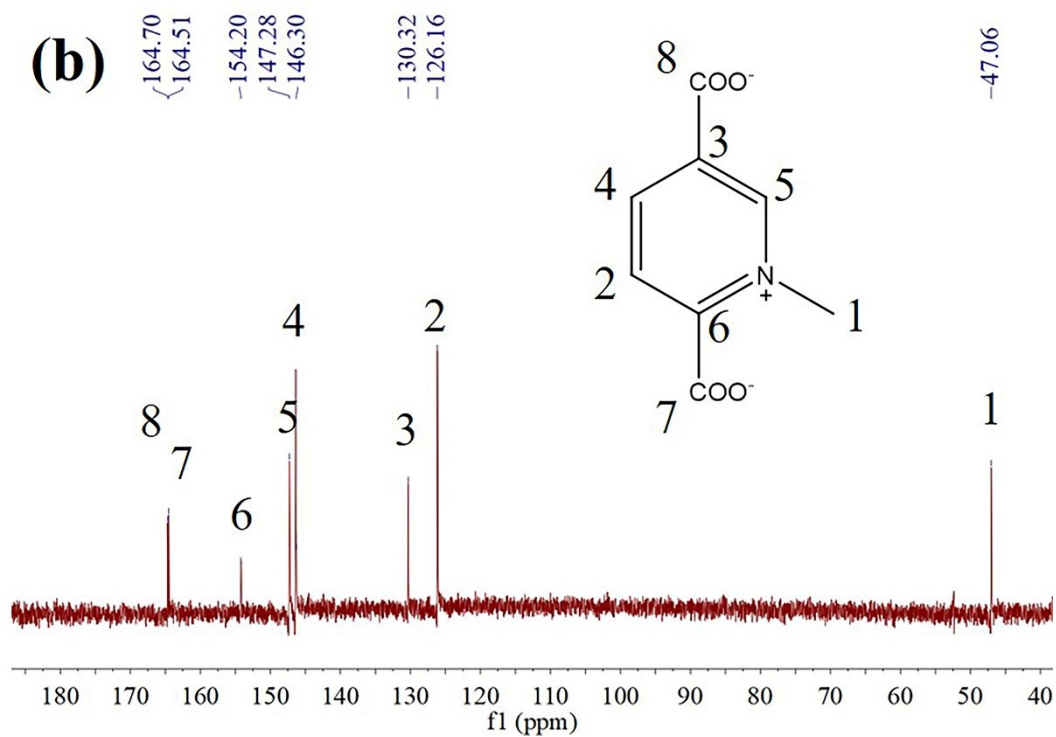

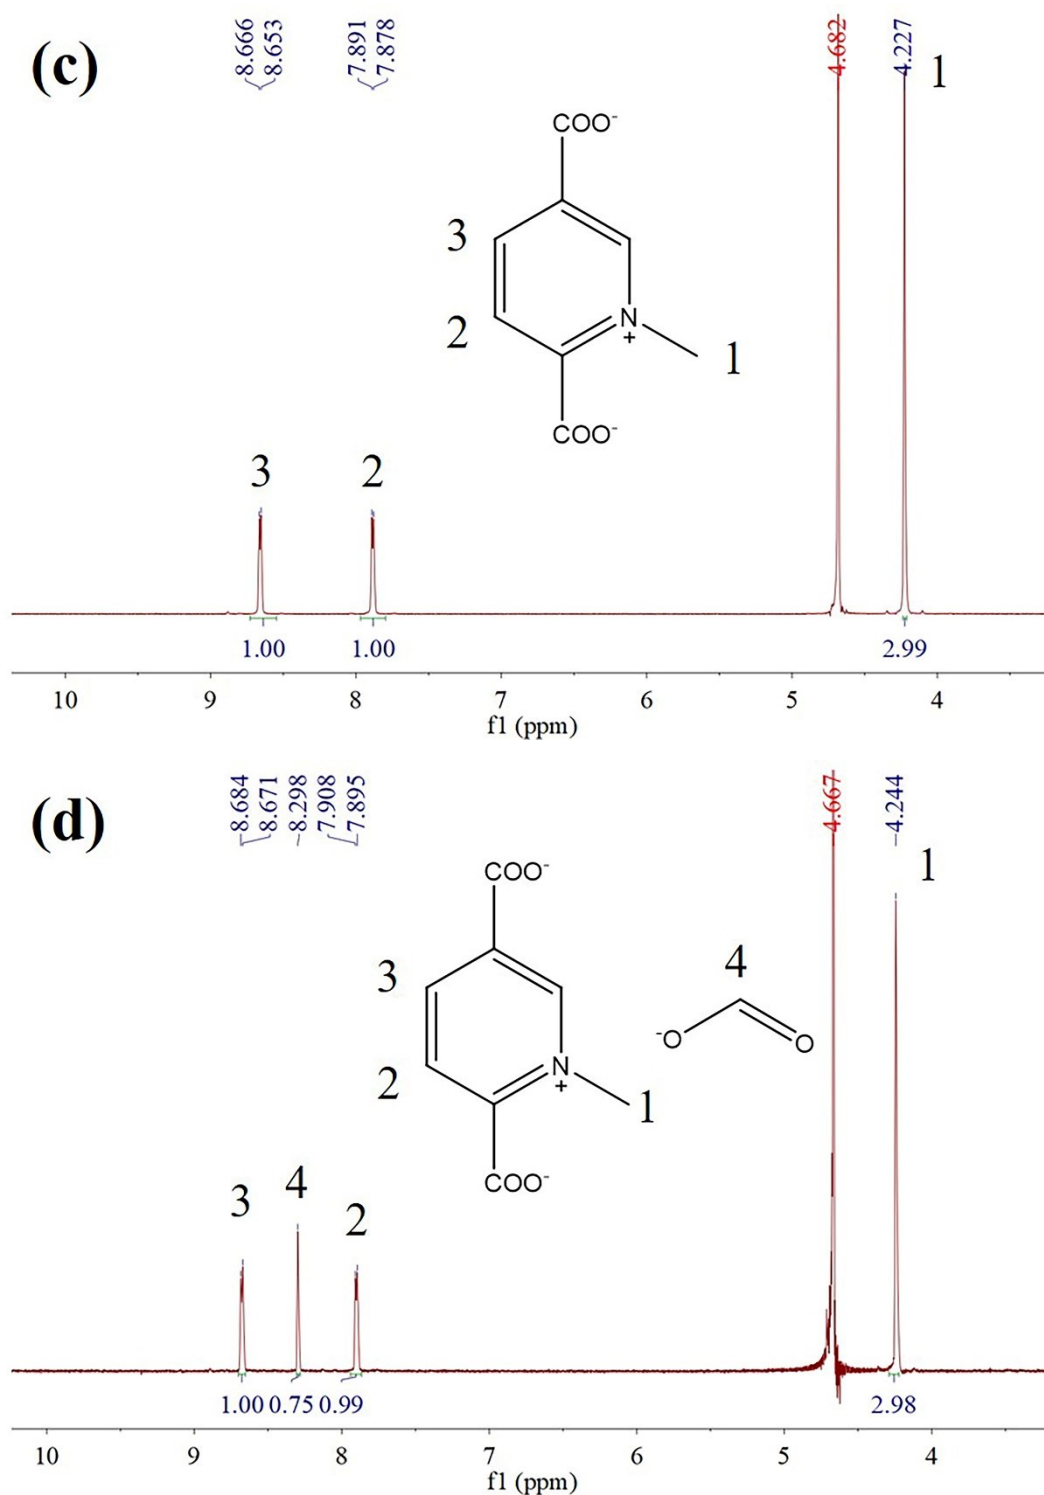

**Fig.S3.** 600 MHz  $^1\text{H}$ -NMR, and 150 MHz  $^{13}\text{C}$ -NMR spectra. **(a)**  $^1\text{H}$ -NMR of me-PyDC ( $\text{D}_2\text{O}$ ),  $\delta=9.23$  (s, 1H), 8.92 (d,  $J=7.8$  Hz, 1H), 8.09 (d,  $J=7.8$  Hz, 1H), 4.36 ppm (s, 3H). **(b)**  $^{13}\text{C}$ -NMR of me-PyDC ( $\text{D}_2\text{O}$ ),  $\delta=164.7$ , 164.5, 154.2, 147.3, 146.3, 130.3, 126.2, 47.1 ppm. **(c)**  $^1\text{H}$ -NMR of me-PyDC in 0.5 M KOH/ $\text{D}_2\text{O}$ ,  $\delta=8.66$  (d,  $J=7.8$  Hz, 1H), 7.88 (d,  $J=7.8$  Hz, 1H), 4.23 ppm (s, 3H). **(d)**  $^1\text{H}$ -NMR of Zr-C-MOF digested in

0.5 M KOH/D<sub>2</sub>O,  $\delta$ =8.67 (d, J=7.8 Hz, 1H), 8.30 (s, 0.75H, H atom from formate), 7.90 (d, J=7.8 Hz, 1H), 4.24 ppm (s, 3H).

Note: Absence of H peak at 9.2 ppm in (c) and (d) compared with (a) was due to deuterium exchange induced by proximity to N-methyl group in alkaline solution

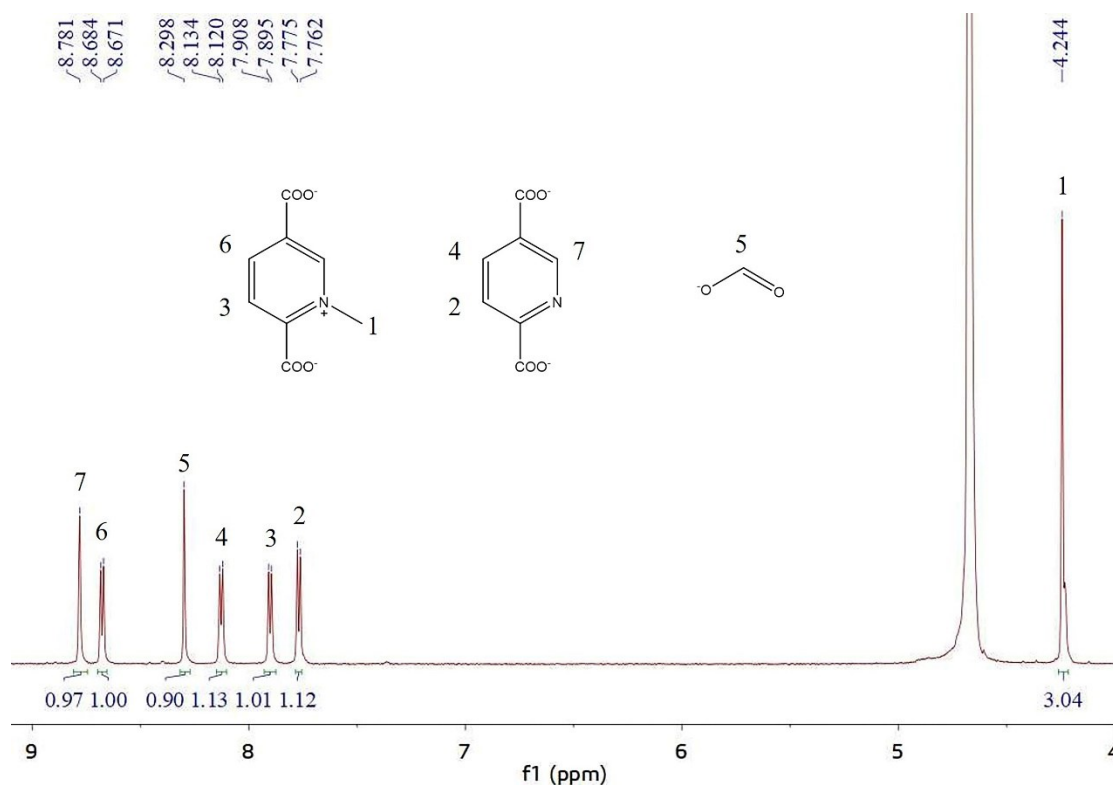

**Fig.S4.** 600 MHz <sup>1</sup>H-NMR spectra. <sup>1</sup>H-NMR of UiO-66-me-PyDC digested in 0.5 M KOH/D<sub>2</sub>O,  $\delta$ =8.78 (s, 1H), 8.68 (d, J=7.8 Hz, 1H), 8.30 (s, 0.9H), 8.13 (d, J=7.8 Hz, 1.13 H), 7.90 (d, 7.8 Hz, 1H), 7.77 (d, 7.8 Hz, 1.12H), 4.24 (s, 3H).

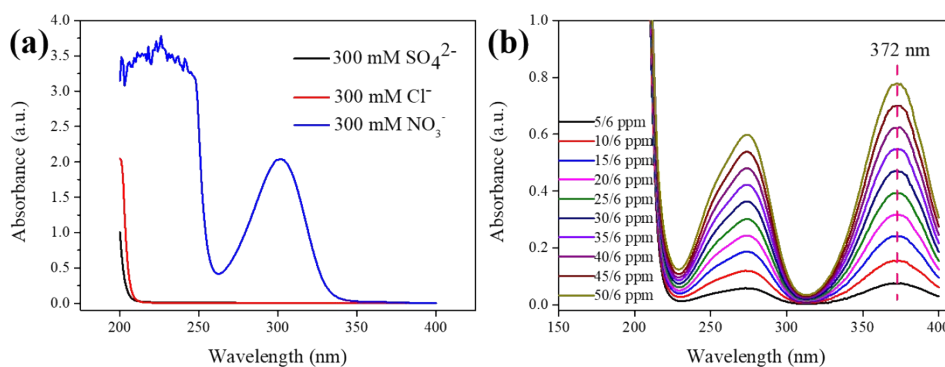

**Fig.S5.** UV-visible spectrum of (a) 300mol·L<sup>-1</sup> Cl<sup>-</sup>, NO<sub>3</sub><sup>-</sup>, SO<sub>4</sub><sup>2-</sup> (b) CrO<sub>4</sub><sup>2-</sup>.

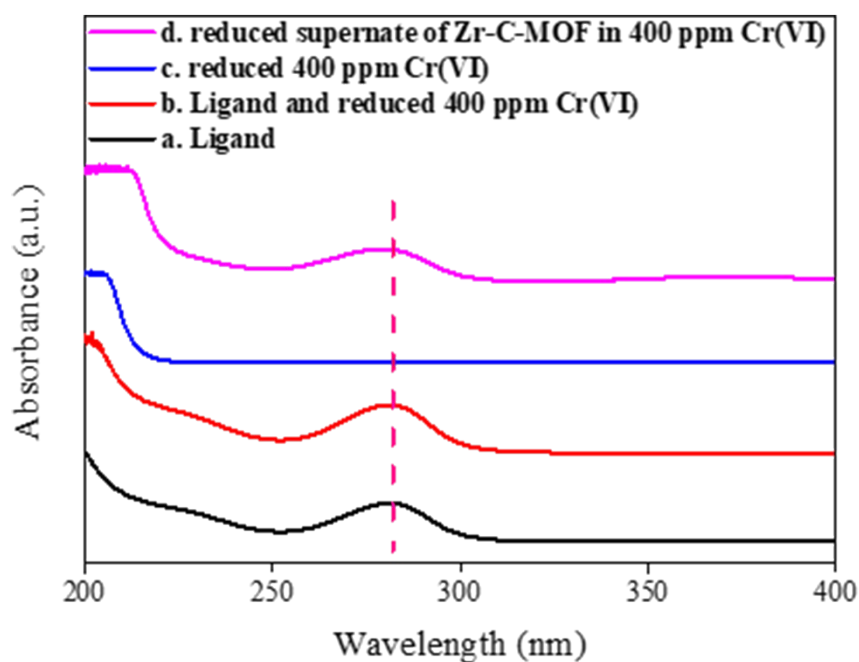

**Fig.S6.** UV-visible spectrum of **(a)** me-PyDC in water **(b)** me-PyDC and 400 ppm  $\text{CrO}_4^{2-}$  reduced by  $\text{FeCl}_2$  **(c)** 400 ppm  $\text{CrO}_4^{2-}$  reduced by  $\text{FeCl}_2$  **(d)** supernatant after adsorption by Zr-C-MOF in 400 ppm  $\text{CrO}_4^{2-}$  and further reduced by  $\text{FeCl}_2$ . To avoid the peak of  $\text{CrO}_4^{2-}$  at 275 nm covering the peak of ligand,  $\text{CrO}_4^{2-}$  was reduced by  $\text{FeCl}_2$ . All samples above were adjusted to pH=12, and centrifuged to afford clear solutions.

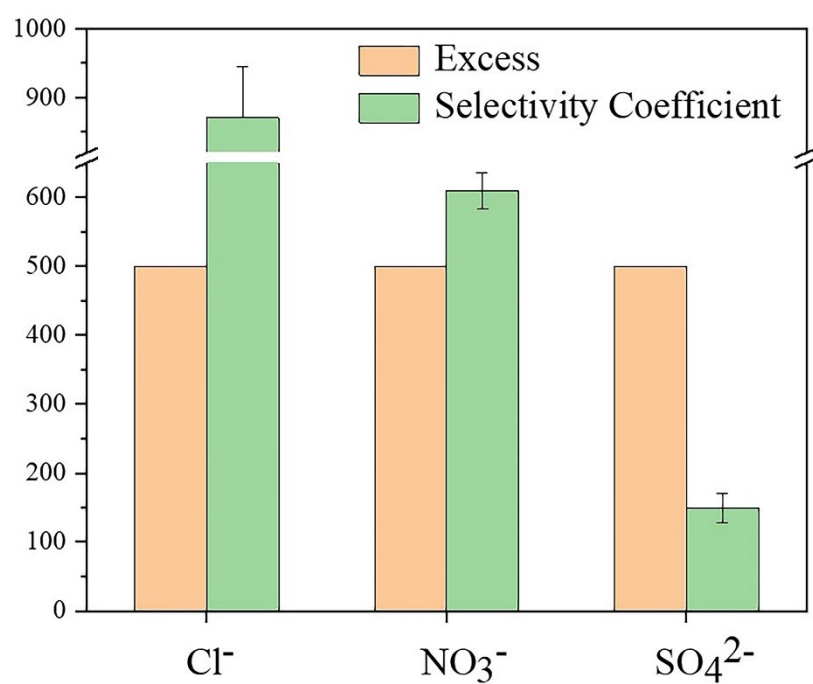

**Fig.S7.** Selectivity coefficient of Zr-C-MOF for Cr (VI) over other anion at 500-times excess.

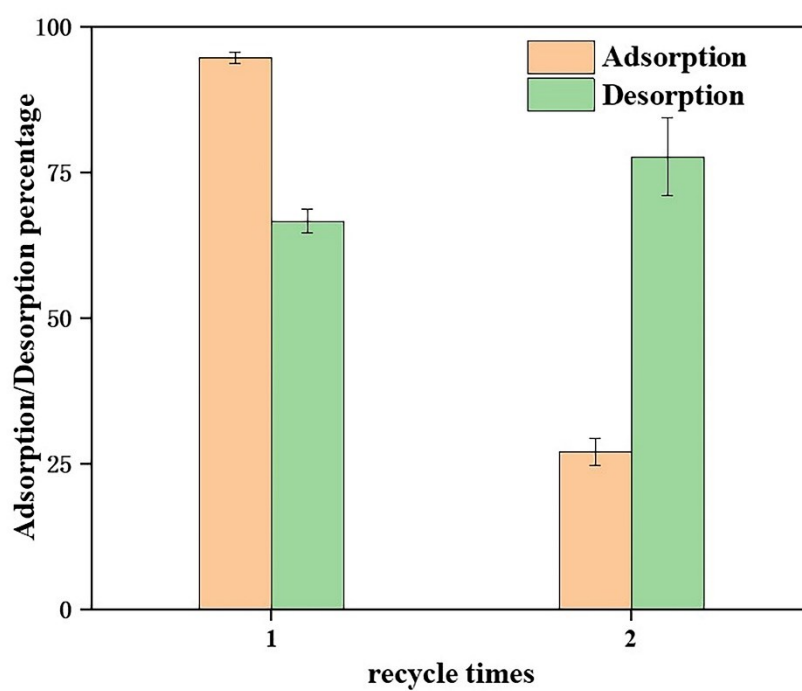

**Fig.S8.** Adsorption-Desorption experiment of cycling experiment

**Table.S3.** Fitting results based on the Pseudo-first-order kinetic and Pseudo-second-order kinetic models.

| Sample   | Pseudo-first-order kinetic model |                                |       | Pseudo-second-order kinetic model |                                                 |       |
|----------|----------------------------------|--------------------------------|-------|-----------------------------------|-------------------------------------------------|-------|
|          | $q_e$<br>( $\text{mg g}^{-1}$ )  | $k_1$<br>( $\text{min}^{-1}$ ) | $R^2$ | $q_e$<br>( $\text{mg g}^{-1}$ )   | $k_2$<br>( $\text{g mg}^{-1} \text{min}^{-1}$ ) | $R^2$ |
| Zr-C-MOF | 49.49                            | 13.46                          | 0.78  | 49.65                             | 9.20                                            | >0.99 |

**Table.S4.** Fitting results based on the Langmuir and Freundlich models.

| Sample   | Langmuir                                     |                                              |       | Freundlich                                   |      |       |
|----------|----------------------------------------------|----------------------------------------------|-------|----------------------------------------------|------|-------|
|          | $q_m$<br>( $\text{mg} \cdot \text{g}^{-1}$ ) | $K_L$<br>( $\text{L} \cdot \text{mg}^{-1}$ ) | $R^2$ | $k_F$<br>( $\text{mg} \cdot \text{g}^{-1}$ ) | n    | $R^2$ |
| Zr-C-MOF | 83.3                                         | 0.923                                        | >0.99 | 23.7                                         | 2.41 | 0.69  |

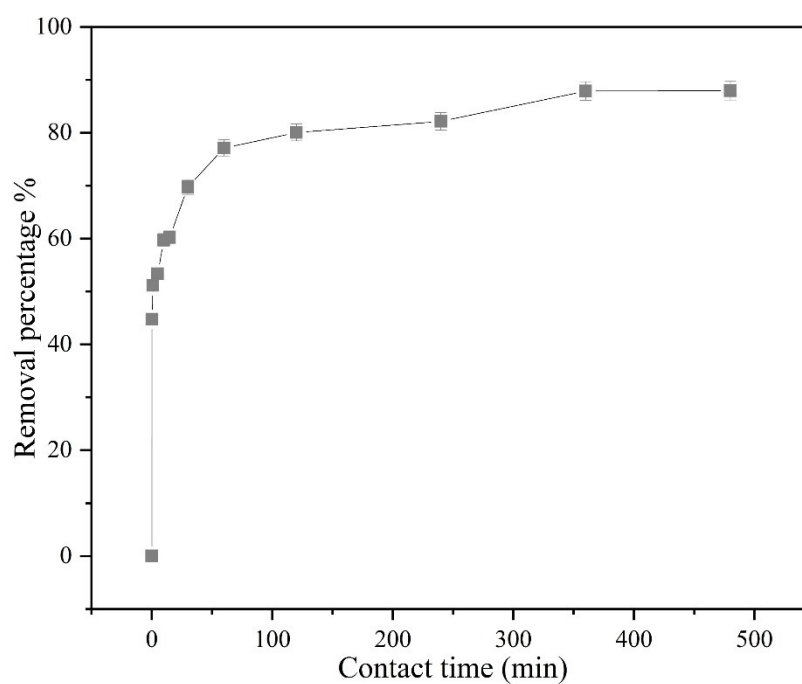

**Fig.S9.** Sorption kinetics of  $\text{CrO}_4^{2-}$  by UiO-66-me-PyDC

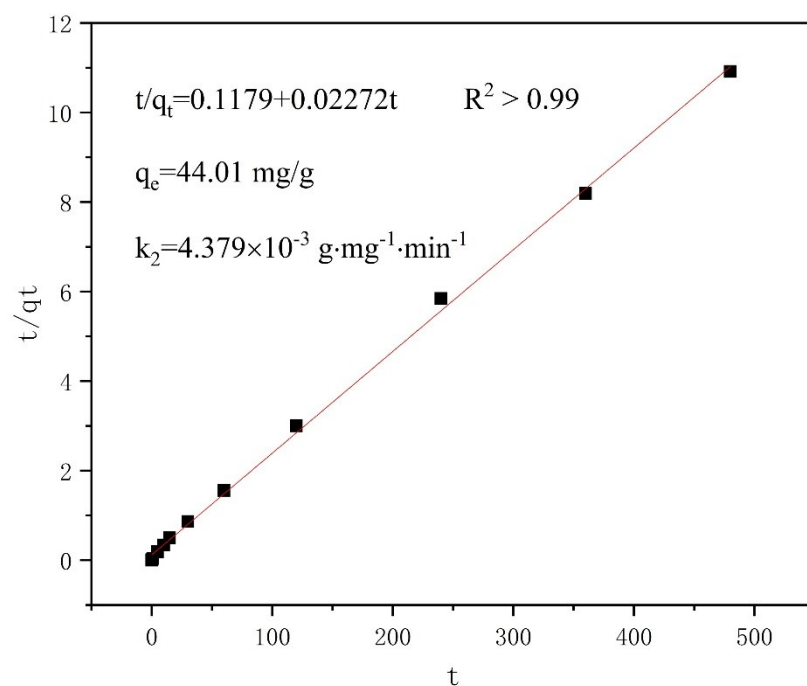

**Fig.S10.** Fitting results of UiO-66-me-PyDC based on the Pseudo-second-order kinetic models.

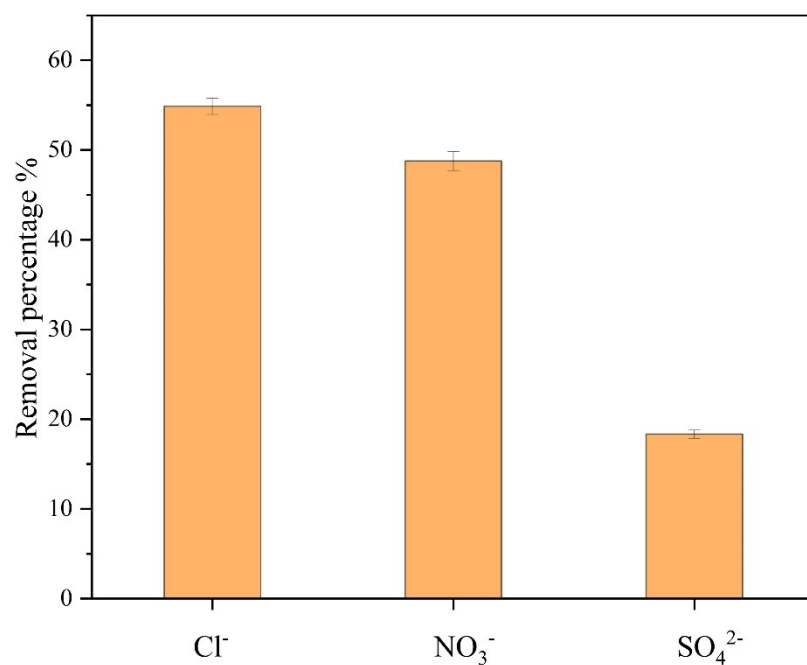

**Fig.S11.** Effect of 500-fold competing anions on the adsorption of CrO<sub>4</sub><sup>2-</sup> by UiO-66-me-PyDC.

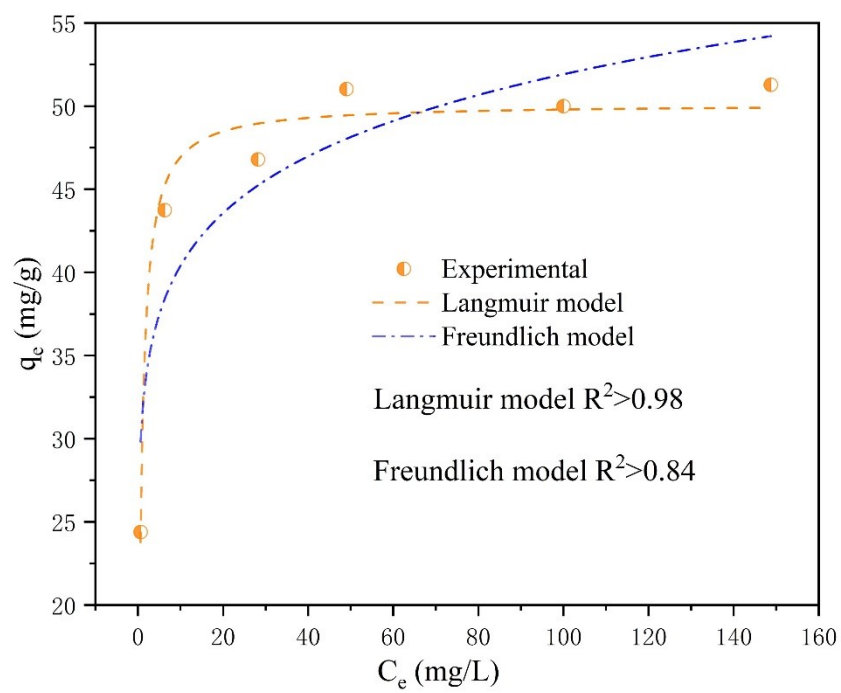

**Fig.S12.** Adsorption isotherm of  $\text{CrO}_4^{2-}$  on UiO-66-me-PyDC.
